# Supplementary material for: Influence of volume overload on endogenous erythropoietin production in hemodialysis patients
Source: Research Square preprint supplement (doi:10.21203/rs.3.rs-7985285/v1), 2025-11-20
Supplement: Supplementary file 1 [file a49f68f4b9d450900bd859cc.xlsx]

## Sheet: Sheet1
Table 1. Characteristics of patients
	All	Group A	Group B	Group C
male/female	26/6	8/3	12/3	5/0
Dry weight (BW at the end of the last session of the previous week), kg (mean ± SD)	65.9 ± 15.9	61.7 ± 11.8	67.6 ± 19.4	70.1 ± 10.7
BW gain at the 1st HD session of the study week, kg (mean ± SD)	2.87 ± 1.16	3.76 ± 0.68	2.82 ± 0.87	1.08 ± 0.39
BW gain at the 1st HD session of the study week, % (mean ± SD)	4.36 ± 1.65	6.10 ± 0.72	4.17 ± 0.43	1.54 ± 0.73
Age, years (mean ± SD)	67.1 ± 9.2	64.4 ± 11.5	66.1 ± 9.0	70.9 ± 9.1
Duration of dialysis, months (mean ± SD)	94.8 ± 63.5	101.3 ± 55.6	89.1 ± 61.9	116.8 ± 82.5
BUN, mg/dL (mean ± SD)	58.9 ± 15.4	66.6 ± 12.5	56.7 ± 17.2	50.6 ± 6.7
Creatinine, mg/dL (mean ± SD)	11.1 ± 2.7	10.8 ± 2.4	11.1 ± 2.6	11.9 ± 3.4
Calcium, mg/dL (mean ± SD)	8.5 ± 0.5	8.5 ± 0.6	8.3 ± 0.3	9.1 ± 0.5
Phosphate, mg/dL (mean ± SD)	5.2 ± 1.5	5.4 ± 1.3	5.4 ± 1.6	4.3 ± 1.0
Total protein, g/dL (mean ± SD)	6.3 ± 0.5	6.4 ± 0.4	6.2 ± 0.4	6.6 ± 0.8
Albumin, g/dL (mean ± SD)	3.5 ± 0.4	3.5 ± 0.2	3.5 ± 0.5	3.4 ± 0.4
White blood cells /μL (mean ± SD)	6534 ± 17963	6891 ± 2586	6013 ± 1318	7660 ± 1338
Hemoglobin, g/dL (mean ± SD)	11.1 ± 3.0	10.5 ± 1.7	11.5 ± 3.9	11.4 ± 2.1
Platelets counts, X103/μL (mean ± SD)	183 ± 54	190 ± 58	174 ± 48	200 ± 55
Reticulocyte, ‰ (mean ± SD)	16.7 ± 6.1	16.9 ± 5.9	17.3 ± 5.0	15.8 ± 1.5
Erythropoietin, mIU/mL (mean ± SD)	9.25 ± 5.18	9.52 ± 5.13	8.41 ± 5.43	11.6 ± 4.01
Iron, μg/dL (mean ± SD)	71.9 ± 20.6	73.2 ± 17.9	77.2 ± 21.1	61.6 ± 11.0
TSAT, % (mean ± SD)	29.2 ± 10.6	27.4 ± 8.5	32.3 ± 11.2	28.2 ± 8.1
Ferritin, ng/mL (mean ± SD)	205.0 ± 239.3	149.4 ± 202.6	283.0 ± 281.4	112.5 ± 55.3
Hepcidin, ng/mL (mean ± SD)	58.6 ± 58.7	53.1 ± 70.2	70.5 ± 54.4	42.6 ± 36.2
CRP, mg/dL (mean ± SD)	0.45 ± 0.59	0.62 ± 0.90	0.32 ± 0.25	0.47 ± 0.35
BW, body weight; HD, hemodialysis; BUN, blood urea nitrogen; TSAT, transferrin saturation; CRP, C-reactive protein.
